# Supplementary material
Source: Research Square preprint supplement (doi:10.21203/rs.3.rs-9489582/v1)
Supplement: Supplementary file 1 [file 877195647ddbc69a7767c43d.docx]

**Appendix A.Variable List and Coding Scheme**

| **Variable** | **Description** | **Coding** |
| --- | --- | --- |
| NUM | Respondent ID | Sequential numeric ID |
| CONSENT | Informed consent | 1 = Yes |
| GROUP | Experimental condition | 1 = Tool-oriented; 2 = Collaborative; 3 = Primary-producer |
| WATCHED | Whether participant watched the video | 1 = Yes; 2 = No |
| MC1–MC5 | Manipulation check items | 1–5 Likert scale |
| QSA1–QSA8 | AI quasi-subjective attribution items | 1–5 Likert scale |
| HCV1–HCV6 | Distinctive value of human creators items | 1–5 Likert scale |
| WE1–WE5 | Work evaluation items | 1–5 Likert scale |
| AAL1–AAL3 | AI authorial legitimacy items | 1–5 Likert scale |
| AIEXP1–AIEXP3 | AI use experience items | 1–5 Likert scale |
| AIATT1–AIATT3 | General attitude toward AI items | 1–5 Likert scale |
| CREXP1–CREXP2 | Creative experience items | 1–5 Likert scale |
| ATTN | Attention check item | Correct response = 4 |
| GENDER | Gender | 1 = Male; 2 = Female; 3 = Other / Prefer not to say |
| EDU | Education level | 1 = High school or below; 2 = Junior college; 3 = Bachelor’s; 4 = Master’s or above |

**Appendix B. English Version of Measurement Items**

| **Construct** | **Code** | **Item** |
| --- | --- | --- |
| **Manipulation Check (MC)** | MC1 | AI played an important role in the creation of this promotional video. |
| MC2 | The main expressive content of this work came primarily from human creators. *(reverse-coded)* |
| MC3 | In this production process, AI functioned more like a creative participant than merely a technical assistant. |
| MC4 | AI made a substantive contribution to the expressive content of this work. |
| MC5 | The final form of this promotional video depended to a considerable extent on AI’s creative contribution. |
| **AI Quasi-Subjective Attribution (AI-QSA)** | QSA1 | In this case, AI seems more like part of an authorial presence than merely a tool. |
| QSA2 | AI appears to have contributed not only to execution, but also to the formation of expression in this work. |
| QSA3 | I think AI can influence the meaning conveyed by a cultural work like this. |
| QSA4 | In this production process, AI seems to occupy a position close to that of a creative subject. |
| QSA5 | AI in this case appears less like a technical system and more like a participant in expression. |
| QSA6 | This work makes me feel that AI can, to some extent, take on a role similar to that of a creator. |
| QSA7 | In this kind of creative context, AI seems capable of saying something, rather than merely generating text or images. |
| QSA8 | Here, AI feels closer to a culturally expressive presence than to a simple production tool. |
| **Work Evaluation Scale (WES)** | WE1 | This promotional video is creative. |
| WE2 | This work is emotionally engaging. |
| WE3 | This promotional video demonstrates strong cultural expressiveness. |
| WE4 | The overall quality of this work is high. |
| WE5 | This promotional video is coherent and compelling in its expression. |
| **AI Authorial Legitimacy (AAL)** | AAL1 | If AI plays an important role in a work like this, it should be regarded to some extent as a co-creator. |
| AAL2 | In this kind of cultural production, AI can be granted a certain degree of authorial legitimacy. |
| AAL3 | If AI substantially contributes to expressive generation, it should receive some form of recognition in authorship. |
| **AI Use Experience** | AIEXP1 | I frequently use generative AI tools (e.g., ChatGPT, Midjourney, Claude). |
| AIEXP2 | I am familiar with how generative AI works. |
| AIEXP3 | I have used AI for writing, design, editing, or other creative tasks. |
| **General Attitude Toward AI** | AIATT1 | Overall, I hold a positive attitude toward generative AI. |
| AIATT2 | I believe AI will have a positive impact on future cultural creation. |
| AIATT3 | I am generally comfortable with AI participating in creative production. |
| **Creative Experience** | CREXP1 | I have some experience in writing, design, video production, or content creation. |
| CREXP2 | I regularly pay attention to cultural, media, or promotional content. |

***All items were measured on a 5-point Likert scale(1 = Strongly disagree 2 = Disagree 3 = Neutral 4 = Agree 5 = Strongly agree)**

**Appendix C. Questionnaire Codebook**

| **Code** | **Construct** | **Item** |
| --- | --- | --- |
| MC1 | Manipulation Check | AI played an important role in the creation of this promotional video. |
| MC2 | Manipulation Check | The main expressive content of this work came primarily from human creators. |
| MC3 | Manipulation Check | In this production process, AI functioned more like a creative participant than merely a technical assistant. |
| MC4 | Manipulation Check | AI made a substantive contribution to the expressive content of this work. |
| MC5 | Manipulation Check | The final form of this promotional video depended to a considerable extent on AI’s creative contribution. |
| QSA1 | AI-QSA | In this case, AI seems more like part of an authorial presence than merely a tool. |
| QSA2 | AI-QSA | AI appears to have contributed not only to execution, but also to the formation of expression in this work. |
| QSA3 | AI-QSA | I think AI can influence the meaning conveyed by a cultural work like this. |
| QSA4 | AI-QSA | In this production process, AI seems to occupy a position close to that of a creative subject. |
| QSA5 | AI-QSA | AI in this case appears less like a technical system and more like a participant in expression. |
| QSA6 | AI-QSA | This work makes me feel that AI can, to some extent, take on a role similar to that of a creator. |
| QSA7 | AI-QSA | In this kind of creative context, AI seems capable of saying something, rather than merely generating text or images. |
| QSA8 | AI-QSA | Here, AI feels closer to a culturally expressive presence than to a simple production tool. |
| WE1 | WES | This promotional video is creative. |
| WE2 | WES | This work is emotionally engaging. |
| WE3 | WES | This promotional video demonstrates strong cultural expressiveness. |
| WE4 | WES | The overall quality of this work is high. |
| WE5 | WES | This promotional video is coherent and compelling in its expression. |
| AAL1 | AAL | If AI plays an important role in a work like this, it should be regarded to some extent as a co-creator. |
| AAL2 | AAL | In this kind of cultural production, AI can be granted a certain degree of authorial legitimacy. |
| AAL3 | AAL | If AI substantially contributes to expressive generation, it should receive some form of recognition in authorship. |
| AIEXP1 | AI Use Experience | I frequently use generative AI tools (e.g., ChatGPT, Midjourney, Claude). |
| AIEXP2 | AI Use Experience | I am familiar with how generative AI works. |
| AIEXP3 | AI Use Experience | I have used AI for writing, design, editing, or other creative tasks. |
| AIATT1 | General Attitude Toward AI | Overall, I hold a positive attitude toward generative AI. |
| AIATT2 | General Attitude Toward AI | I believe AI will have a positive impact on future cultural creation. |
| AIATT3 | General Attitude Toward AI | I am generally comfortable with AI participating in creative production. |
| CREXP1 | Creative Experience | I have some experience in writing, design, video production, or content creation. |
| CREXP2 | Creative Experience | I regularly pay attention to cultural, media, or promotional content. |

**Appendix D Research Design Flowchart**

**

**
